# 1 **Matrix factorization and transfer learning uncover regulatory biology** 2 **across multiple single-cell ATAC-seq data sets**

3

4 Rossin Erbe<sup>1</sup> (rerbe1@jhmi.edu), Michael D. Kessler<sup>1</sup> (mkessler11@jhmi.edu), Alexander V.  
5 Favorov<sup>1,2,3</sup> (avf@jhmi.edu), Hariharan Easwaran<sup>1</sup> (Heaswar2@jhmi.edu), Daria A. Gaykalova<sup>1</sup>  
6 (dgaykal@jhmi.edu), and Elana J. Fertig<sup>1\*</sup> (ejfertig@jhmi.edu)

7

8 1 The Johns Hopkins University School of Medicine, Baltimore, MD, USA

9 2 Vavilov Institute of General Genetics, Moscow, Russia

10 3 Research Institute of Genetics and Selection of Industrial Microorganisms, Moscow, Russia

11

12

## 13 **Abstract**

14 While single-cell ATAC-seq analysis methods allow for robust clustering of cell types, the  
15 question of how to integrate multiple scATAC-seq data sets and/or sequencing modalities is still  
16 open. We present an analysis framework that enables such integration by applying the CoGAPS  
17 Matrix Factorization algorithm and the projectR transfer learning program to identify common  
18 regulatory patterns across scATAC-seq data sets. Using publicly available scATAC-seq data,  
19 we find patterns that accurately characterize cell types both within and across data sets.  
20 Furthermore, we demonstrate that these patterns are both consistent with current biological  
21 understanding and reflective of novel regulatory biology.

22

## 23 **Background**

24 The Assay for Transposase Accessible Chromatin (ATAC-seq) subjects DNA to a hyperactive  
25 transposase in order to tag euchromatic regions of the genome for sequencing. ATAC-seq thus  
26 provides a quantitative estimate of genome-wide chromatin accessibility, and can be used to  
27 infer which genomic regions are most likely to interact directly with proteins and other  
28 biologically relevant molecules [\(1\)](#), [\(2\)](#). Specifically, accessibility at enhancers and promoters  
29 has considerable influence on the binding of transcription factors (TFs) and other transcriptional  
30 machinery [\(3\)](#). Quantification of accessibility at these regions enables the characterization of the

31 regulatory biology that defines cell types and samples of interest [\(1\)](#), [\(2\)](#).

32

33 ATAC-seq data is often summarized by binning reads into data-defined genomic regions of  
34 frequent accessibility (generally termed peaks) or by aggregating the reads that contain  
35 annotated DNA motifs (e.g. transcription factor binding sites), which are collectively the targets  
36 of defined trans-acting factors (e.g. transcription factors) [\(4\)](#). Aggregating reads in these ways  
37 allows for a comparison of accessibility variation between samples and inference of the  
38 chromatin landscape of cell populations. However, the functional annotations available for these  
39 features are often incomplete, which can present significant challenges in the interpretation of  
40 ATAC-seq data, and can limit the integration of accessibility information across data sets.  
41 Furthermore, the high dimensionality and extreme sparsity of single cell ATAC-seq data  
42 (scATAC-seq) significantly compounds these analytic challenges, and further limits  
43 interpretation [\(5\)](#).

44

45 Therefore, computational methods are necessary to determine the patterns of accessibility that  
46 differentiate the regulatory biology associated with disparate cell populations in scATAC-seq  
47 data. Current tools for scATAC-seq analysis robustly cluster and annotate cell types. For  
48 example, ChromVAR, BROCKMAN, *Cusanovitch2018*, and scABC [\(6\)](#), [\(7\)](#), [\(8\)](#), [\(9\)](#) all output  
49 both clustering and inferred transcription factor binding within clusters, using clustering accuracy  
50 as their primary metric to evaluate efficacy. SnapATAC and cisTopic additionally provide the  
51 ability to query upregulated pathways from scATAC-seq data, but are still most strongly oriented  
52 towards the goal of effectively differentiating cell populations [\(5\)](#), [\(10\)](#). These methods provide  
53 effective tools for the analysis of individual scATAC-seq data, but require further extension to  
54 integrate the information learned from multiple scATAC-seq experiments or multiple sequencing  
55 modalities.

56

57 We develop a framework to enable cross-study and cross-platform analysis of multiple scATAC-  
58 seq data sets through the application of the Bayesian Non-Negative Matrix Factorization  
59 algorithm, CoGAPS, [\(11\)](#), [\(12\)](#) in conjunction with the transfer learning program projectR [\(13\)](#),  
60 [\(14\)](#). We demonstrate that CoGAPS simultaneously identifies robust cell types, upregulated  
61 pathways, and TF activity from scATAC-seq data. Notably, the projectR transfer learning  
62 method allows for the identification of the learned signatures of regulatory biology that we  
63 identify with CoGAPS within other datasets. Finally, we use matched RNA-seq data to provide  
64 orthogonal evidence for candidate regulatory mechanisms identified by our scATAC-seq  
65 analysis method. This workflow facilitates the development of consensus accessibility  
66 signatures for cellular populations using multiple data sets and data modalities. Furthermore, we  
67 demonstrate that combined CoGAPS analysis of scATAC-seq and scRNA-seq identifies novel  
68 biology, such as the association of the transcription factor Hnf4a in mammalian cardiac  
69 development.

70

## 71 **Results/Main**

### 72 The scATAC-CoGAPS algorithm

73 CoGAPS is a sparse, Bayesian matrix factorization algorithm which decomposes a matrix of  
74 sequencing data into two output matrices, representing learned latent patterns across all the  
75 samples and genomic features of the input data [\(11\)](#), [\(12\)](#). The first of these is called the  
76 Amplitude matrix, and it contains a numerical representation of the degree to which each feature  
77 contributes to each latent pattern learned by the algorithm. The second is termed the Pattern  
78 matrix, which represents the degree to which each learned latent pattern is present in each  
79 single cell (Fig. 1A) [\(15\)](#). Latent patterns are intended to capture common accessibility across  
80 both genomic features and cells, and thus identify the regulatory biology common among cells

81 in the data (hereafter they will be referred to simply as patterns). The scATAC-CoGAPS  
82 algorithm takes as input a count matrix with reads aggregated across any relevant summary  
83 feature (e.g. peak regions or DNA motifs that identify TF binding sites).

84

85 The values of the Pattern matrix can be used to distinguish cell types or cell populations specific  
86 to each chromatin-accessibility derived pattern. This correspondence allows us to annotate  
87 patterns as associated with a particular group of cells. In contrast to standard clustering  
88 methods, the patterns learned from CoGAPS can simultaneously identify patterns that delineate  
89 individual cell types as well those shared across cell types.

90

91 The pattern identified by each row of the Pattern matrix corresponds to a set of gene weights in  
92 each column of the Amplitude matrix. These weights provide information on which specific  
93 features (peaks, motifs, etc.) contribute the most to each pattern. In this way, features can be  
94 linked to the cell types or cellular states defined by associated patterns, which enables the  
95 identification of the active regulatory programs within each group of cells. Further, these learned  
96 patterns can be input to our projectR transfer learning method [\(13\)](#), [\(14\)](#) to query their  
97 occurrence in related cells in other scATAC-seq datasets.

98

99 Assessment of regulatory programs from the amplitude matrix of scATAC-CoGAPS depends  
100 upon the features selected for summarization of the scATAC-seq data. The approach outlined  
101 here focuses on the annotation of both peaks and DNA motifs. When using open chromatin  
102 peaks to define our feature set, we employ two main analysis steps (Fig. 1B). First, we match  
103 peaks to genes that fall within the regions they cover, have promoters within these regions, or  
104 are in close proximity to these regions. These sets of genes can then be compared to known  
105 pathways via gene overlap analysis [\(16\)](#), returning significantly overlapping pathways. Peaks

106 can also be searched for known DNA motifs and their possible TF bindings. The frequency of  
107 these potential TF binding sites can inform an understanding of which regulatory effectors are  
108 characteristic of a specific cell population. While other analysis methods require one particular  
109 mode of feature summarization, CoGAPS allows for the use of any feature that facilitates  
110 aggregation of reads into a count matrix. If we instead use a feature space initially defined by  
111 DNA motifs, we can again match pattern-defining motifs directly to known TF binding sites to  
112 determine enrichment for particular TFs, often extending the number of unique regulatory  
113 patterns we are able to uncover from the data (compared to using a peak based feature space  
114 alone). However, given that a feature space of peaks provides more options to interrogate  
115 regulatory biology (i.e. pathways and TF binding vs TF binding alone), we employ peak  
116 summarization as default in our analysis throughout, and utilize a motif-defined feature space to  
117 supplement this analysis.

118

#### 119 scATAC-CoGAPS differentiates known cell identities in scATAC-seq data

120 To demonstrate the capacity of CoGAPS to distinguish cell populations, we run the algorithm on  
121 publicly available scATAC-seq data published by Schep et al (6). These data derive from twelve  
122 cell cultures, comprising ten different known cell lines (listed in Supplemental Table 1). The cell  
123 lines in the data are generally well-characterized, which allows for validation of the cell-type  
124 specific regulatory programs predicted by scATAC-CoGAPS. Using peaks to define our feature  
125 space, we apply CoGAPS to search for seven patterns of accessibility in the data (see Methods  
126 for dimensionality selection). After the factorization, we associate each cell with a single pattern  
127 using the PatternMarker statistic included in the CoGAPS package (12). Pattern classifications  
128 learned by CoGAPS on this data set align well with *a priori* knowledge of cell line annotations  
129 (Fig 2., Supplemental Table 2). Cells belonging to the same cell line are almost always

130 classified within the same pattern (Adjusted Rand Index of 0.90).

131

132 Pattern 1 and Pattern 2 perfectly classify K562 Erythroleukemia and TF1 Erythroblast cells,  
133 respectively. GM B-cell derived LCLs, BJ Fibroblasts, and H1 Embryonic Stem Cells each have  
134 2 or fewer cells misclassified by patterns 3, 4, and 5. We note that Pattern 3 captures all three  
135 cultures of GM lymphoblastoid cell lines (GM LCLs), indicating that CoGAPS is differentiating  
136 these cell lines via regulatory differences of biology rather than through technical artifacts of cell  
137 culture. Pattern 6 is most significantly associated with HL60 Leukemia cells, however, due to the  
138 sparse signal in pattern 6, the patternMarker statistic only assigns one HL60 cell to that pattern,  
139 and the rest to pattern 7. Pattern 7 is assigned most of the remaining cells in the data, and while  
140 it is most significantly associated with PB1022 Monocytes, it also shows signal across HL60  
141 Leukemia cells, Lymphoid-Primed Multipotent Progenitors, and the two AML patient cell lines.  
142 We hypothesize that the regulatory similarity derived from the shared hematopoietic origin of  
143 these cells is responsible for this common signal.

144

145 While the CoGAPS solution described above is for seven patterns, the selection of an optimal  
146 dimensionality for unsupervised learning remains an open question, and there probably is no  
147 single correct number of patterns to use [\(17\)](#). Therefore, we also run CoGAPS to analyze the  
148 scATAC-seq data for additional dimensions. When increasing dimensionality beyond 7,  
149 CoGAPS finds patterns that more strongly differentiate Monocytes and Lymphoid-Primed  
150 Multipotent Progenitor cells, but still does not return patterns distinguishing the two Acute  
151 Myeloid Leukemia patient cell lines apart from Lymphoid Primed Multipotent Progenitors  
152 (Supplemental Fig. 1). For example, at the 13-pattern dimensionality, we observe that pattern 1  
153 mainly distinguishes monocytes, while pattern 10 now captures the unifying signal across HL60,  
154 LMPP, and AML patient cells. At the same time, with this higher dimensionality, patterns 4, 6, 8,

155 11, and 13 have very sparse signal and appear to identify only single cells. Thus, we observe a  
156 tradeoff at higher dimensions between improved differentiation of cell types and an increased  
157 number of sparse patterns. Based on our results across dimensions, we retain the seven-  
158 pattern solution for our remaining analyses in order to optimize cell type differentiation while  
159 minimizing the number of sparse patterns that are only associated with a few cells.

160

161 Analysis of accessible features predicts regulatory programs consistent with established biology  
162 of cell lines

163 After using CoGAPS patterns from the seven-dimensional solution to define cellular populations,  
164 we use the values of the corresponding feature weights in the Amplitude matrix to ascertain  
165 which peaks contribute the most to each learned pattern using the PatternMarker statistic. The  
166 peaks identified by the PatternMarker statistic reveal the accessible features of the data that  
167 themselves strongly distinguish cell types, which we shall refer to as PatternMarker peaks (Fig.  
168 3A). For most cell lines, the accessibility of the PatternMarker peaks learned from CoGAPS  
169 analysis better distinguishes the cell lines than the pattern weights themselves. This result  
170 suggests that the features CoGAPS learns reflect biologically relevant differences in  
171 accessibility between the cell populations that it is stratifying. Due to its increased granularity,  
172 this analysis provides further evidence that Pattern 6 is characteristic of HL60 Leukemia cells,  
173 and that the peaks associated with Pattern 7 are the most accessible in PB1022 Monocytes.

174

175 The learned PatternMarker peaks can be associated with cell-specific regulatory mechanisms  
176 using pathway and transcription factor enrichment analysis (Supplemental Files 1 and 2). For  
177 example, Pattern 1 (the K562 Erythroleukemia-associated pattern) identifies the MSigDB  
178 HALLMARK HEME METABOLISM pathway as the most significantly associated with the cell  
179 line (Fig. 3B). This matches our biological expectation, as increased accessibility of or near

180 genes associated with Heme metabolism is consistent with the erythroid lineage K562 cells  
181 derive from. The second most significant pathway is HALLMARK MITOTIC SPINDLE, which  
182 suggests the uncontrolled division of this cancer cell line may be driven by epigenetic changes.

183

184 Motif analysis from these accessible peaks further identifies TFs with the most accessible  
185 binding sites as potentially active regulators in the pattern-associated cell population. The top 15  
186 TFs enriched within the K562 cell associated pattern include TAL1, EGR1, RREB1, and NFE2  
187 which have all been associated with leukemia [\(18\)](#), [\(19\)](#), [\(20\)](#) or, in the case of NFE2, is an  
188 erythroid nuclear factor. TAL1 is a noteworthy hit, as K562 cells were used to establish TAL1 as  
189 a driver of leukemia [\(18\)](#), thus providing support for the validity of this approach. To measure  
190 the likelihood that the TFs are themselves expressed, we then find the relative accessibility  
191 signal at the peaks overlapping the genes of these candidate TFs. All of the above TFs  
192 identified from motif analysis also have increased gene accessibility compared to the average  
193 peak accessibility in K562 cells, with TAL1 having the highest relative accessibility (Supp. Fig.  
194 2). The accessibility of the gene is most notable for the peak overlapping with the transcriptional  
195 start site (TSS) of the gene, with the frequency of the accessibility signal decreasing among the  
196 peaks further from the TSS.

197

198 The genes overlapping with the peaks that contribute most strongly to the Monocyte-associated  
199 Pattern 7 are enriched for the MSigDB HALLMARK INFLAMMATORY RESPONSE and  
200 HALLMARK TNFA SIGNALING VIA NFKB pathways (Fig. 3C). Both pathways are biologically  
201 consistent with the known role of monocytes in immunity and inflammation, as well as with the  
202 immunological roles of the other hematopoietic lineage cells secondarily associated with Pattern  
203 7. Within the top 15 TFs with the most enriched binding sites, IRF1, STAT1, CEBPA, and SPI1  
204 all have previously established roles in the regulation of monocytes [\(21\)](#), [\(22\)](#), [\(23\)](#), [\(24\)](#) and all



205 TF genes have increased gene accessibility relative to average for monocyte peaks in the data  
206 (Fig. 3C). The pathway and TF enrichment results for all other patterns are listed in  
207 Supplemental Files 1 and 2. Taken together, these results demonstrate the capacity of scATAC-  
208 CoGAPS to identify regulatory features of biological relevance from scATAC-seq data.

209

210 Summarization of the count matrix by DNA motifs extends the regulatory patterns CoGAPS  
211 learns from scATAC-seq

212 While using peaks as summarization of ATAC-seq reads provides more avenues for  
213 downstream analysis, it has been previously shown that motif-level summarization is an  
214 additional information rich feature space for scATAC-seq analysis (6). Therefore, we compare  
215 our previous peak-level CoGAPS analyses for the Schep et al. data set (6) to motif-based  
216 CoGAPS analyses (labeled Pattern Defining Motifs in Fig 1B) of the same dataset to assess the  
217 impact of feature selection on the inferred regulatory programs. CoGAPS analysis of this motif-  
218 based count matrix identified 10 total patterns from the data (Supplemental Figure 3A). Patterns  
219 4, 6, and 8 from this motif-level CoGAPS run differentiate GM-LCLs, BJ Fibroblasts, and TF1  
220 Erythroblasts, respectively.

221

222 The other patterns identify additional cell populations that are not found when the data are  
223 analyzed using peak feature space (Supplemental Fig. 3A). For example, Pattern 10 identifies  
224 regulatory similarity between K562 Erythroleukemia cells and TF1 Erythroblasts, a pattern that  
225 peak based analysis does not find (Supplemental Fig. 3B). In Pattern 10, we identify high  
226 enrichment of candidate TF binding sites for GATA transcription factors, which are known to  
227 have critical roles in erythroid differentiation and are shared between Erythroleukemia and  
228 Erythroblasts (25). We additionally find that the PatternMarker motifs identified by CoGAPS in  
229 this analysis are nearly all different than the motifs found by peak-based analysis. When

230 patterns that seem to differentiate the same cell types are compared, less than 10% of the  
231 motifs identified by each analysis overlap (overlap for Fibroblast associated patterns is given in  
232 Supplemental File 3).

233

234 These results suggest that using DNA motif-based summarizations identifies additional  
235 regulatory information from the same cell types contained within the same data, and directly  
236 supports the use of both peak and motif based summarizations to fully characterize the  
237 regulatory biology of cellular subpopulations in scATAC-seq data. Notably, motif-based  
238 summarization appears to better identify patterns of accessibility that are shared across multiple  
239 cell types, while peak-based summarization better differentiates individual cell types.

240

241 Transfer Learning with projectR establishes the generality of the regulatory programs CoGAPS  
242 patterns capture

243 Once we have established signatures of accessibility for cell populations in our data, we employ  
244 transfer learning with the R/Bioconductor package projectR (13), (14) to determine whether  
245 these signatures appear in similar cell populations from other experiments. Notably projectR can  
246 efficiently detect the presence of previously learned patterns of accessibility in separate  
247 scATAC-seq data as a means of *in silico* validation and discovery. This capability allows for the  
248 development of cell population-specific accessibility signatures based on CoGAPS results,  
249 which can be used to test for regulatory programs of interest in novel samples.

250

251 We demonstrate projectR's application to scATAC-seq by transferring the patterns learned in  
252 peak-level summaries of the Schep et al. (6) cell line data to scATAC-seq data from Buenrostro  
253 et al. (26), which contains 10 different hematopoietic lineage cell types labelled via  
254 Fluorescence Activated Cell Sorting (Supplemental Table 3). We project the monocyte-

255 associated pattern (Pattern 7) from the Schep et al. data onto the Buenrostro et al. data and  
256 observe that the monocytes in the target data are most significantly associated to the  
257 accessibility pattern (Fig. 4A). Comparing average cell line association with the pattern in the  
258 target data may make the specificity of the monocyte association more visually clear (Supp. Fig.  
259 4). As previously noted, there is considerable Pattern 7 signal among other non-monocyte  
260 hematopoietic-lineage cells within the Schep et al. data set, and this is reflected in the general  
261 signal observed in the Buenrostro target data set.

262

263 ProjectR can also provide information on the regulatory overlap between different cell types. In  
264 this case, it provides insight into the regulatory similarity between two distinct cell populations.  
265 For example, projection of the K562 Erythroleukemia cell line pattern from the Schep et al. data  
266 (Pattern 1) into the Buenrostro et al. data has the strongest signal in Megakaryocyte-Erythrocyte  
267 progenitors (Fig. 4B). This observation supports the presence of overlapping patterns of  
268 accessibility between these two populations, consistent with the expected regulatory similarity  
269 between Erythroleukemia and Erythrocyte progenitor cells.

270

271 Analysis of matched scRNA-seq data validates regulatory programs learned from scATAC-  
272 CoGAPS

273 When scRNA-seq data is available for cells from the same experimental conditions as scATAC-  
274 seq data, we can validate ATAC-CoGAPS predicted TF activity using transcription data of  
275 known TF gene targets. CoGAPS can be applied to the matched scRNA-seq data to find  
276 pattern-defining genes for each cell population as described in (12). These genes can be ranked  
277 on the basis of their contribution to each pattern (using the PatternMarker statistic), and then  
278 tested for enrichment in the set of genes known to be regulated by a candidate TF using Gene  
279 Set Enrichment Analysis (GSEA) (27) (Supp. Fig. 5). In this analysis method, genes known to

280 be regulated by a TF are used as the “pathways” input for GSEA with the ranked PatternMarker  
281 genes.  
282  
283 No matching scRNA-seq data was available for the Schep et al. data set. Therefore, we sought  
284 to validate this method using matched scRNA-seq and scATAC-seq data from mouse  
285 embryonic cardiac progenitor cells at days 8.5 and 9.5 of development, as described by Jia et  
286 al. (28). We run CoGAPS on both data sets to learn 7 patterns in peak-level summarized  
287 scATAC-seq data and 6 patterns in the scRNA-seq data. There is much more regulatory  
288 similarity than dissimilarity between cardiac progenitors only one day apart in development, and  
289 thus the most distinctive patterns we find in the scATAC-seq data set are those that reflect  
290 sustained open chromatin across days 8.5 and 9.5 of development (Patterns 1 and 7) (Supp.  
291 Fig. 6). As patterns 3 and 6 from the scRNA-seq experiment also have signal across all cells in  
292 the data, we continue by comparing the patterns found across cells rather than the patterns that  
293 stratify distinct cell populations. To make this comparison, we first find TFs enriched within the  
294 scATACseq data for all cells, and then list the genes known to be regulated by each of the TFs.  
295 Then, we find the PatternMarker genes from scRNA-seq from the patterns that show signal  
296 across all cell types (patterns 3 and 6). GSEA between the sets of genes regulated by the  
297 predicted TFs and the PatternMarker genes provides significant support for Tbx20 TF activity  
298 (FDR adjusted p-value of 0.015) and Hnf4a activity (FDR adjusted p-value of 0.042) across  
299 these developing cardiac cells (Fig. 5A, 5B). Tbx20 plays a major role in cardiac development  
300 (29), which is consistent with the known biology of embryonic cardiac cells. A homologue of  
301 Hnf4a was recently shown to play an important role in normal embryonic development of the  
302 chicken heart (30). This result corroborates that finding and suggests that Hnf4a may play a role  
303 in cardiac development across a wide phylogenetic range; particularly that it acts in mammals  
304 as well.

305

306 To investigate the accessibility of genes associated with Tbx20 using scRNA-seq, we find  
307 overlapping peaks of said genes within matched scATAC-seq data. The peaks corresponding to  
308 the Tbx2 gene and the Nkx2-5 gene are accessible across the cells in the data (fold  
309 accessibility 2.39 and 1.51, respectively), while Mef2c and Nppa peaks are less accessible than  
310 average (fold accessibility 0.84 and 0.30) (Fig. 5C, Supp. Fig. 7). The Tbx2 gene is particularly  
311 accessible in the peak overlapping with its transcriptional start site (fold accessibility 3.11). The  
312 lack of accessibility among the Mef2c and Nppa genes suggests that accessibility and gene  
313 expression do not always align, though we do observe general correspondence between the  
314 two data modalities, particularly in transcriptional start site overlapping peaks.

315

## 316 **Discussion**

317 Single-cell epigenomics methods such as scATAC-seq capture a wide array of regulatory  
318 features genome wide, but our ability to extract this information is still limited. Here we present  
319 the application of CoGAPS and projectR to scATAC-seq, providing an analysis framework for  
320 Bayesian Non-Negative Matrix Factorization to uncover regulatory information from sparse,  
321 high-dimensional epigenomics data and project these learned patterns across data sets and  
322 sequencing platforms.

323

324 CoGAPS (Coordinated Gene Expression in Pattern Sets) was originally developed for the  
325 analysis of gene expression data. The ability of CoGAPS to extract relevant patterns from  
326 different data sources is a great strength of the algorithm. Here, we leverage this capacity to  
327 develop a basic framework for integrative analysis of multiple scATAC-seq and scRNA-seq data  
328 sets. Since CoGAPS can be applied to any sequencing technology that can produce a count  
329 matrix, this framework we present has the potential to support the integrated analysis of

330 additional multi-omics data sets. The importance of this capacity continues to grow with the  
331 increasing affordability and concomitant ubiquity of sequencing technologies, and the massive  
332 and varied data sets such technologies produce. Furthermore, CoGAPS allows for the  
333 summarization of reads to any relevant genomic feature (e.g. peaks, DNA motifs, etc.) and  
334 facilitates the learning of a wider range of regulatory patterns than methods that require a  
335 specific summarization method.

336

337 This study presents CoGAPS and projectR as a paired set of tools for cross-study analyses of  
338 regulatory biology from scATAC-seq data. The projectR transfer learning software is broadly  
339 applicable for features learned with unsupervised methods in addition to CoGAPS [\(14\)](#). This  
340 flexibility of projectR will support further cross-study analyses with emerging scATAC-seq  
341 methods [\(15\)](#). While this study demonstrates the robustness of CoGAPS for inferring regulatory  
342 biology from scATAC-seq data, we resolve different aspects of that biology at different  
343 dimensionalities and data summarizations. We hypothesize that accounting for these features  
344 across hyperparameters as well as additional features informed from ensembles of features  
345 learned from alternative methods are critical to resolve the complex landscape of regulatory  
346 biology encoded in the data, consistent with emerging literature on multi-resolution methods  
347 [\(31\)](#).

348

349 We find that TF motif-based analysis tends to find more patterns that have signal across cell  
350 types, while peak-based analysis finds more cell type specific signal. We hypothesize that each  
351 peak mostly contains signal corresponding to one or a few genes, and therefore peaks more  
352 finely map cell populations to distinct cell types. Transcription factor motifs, on the other hand,  
353 contain signal corresponding to larger regulatory changes that are more likely to be shared  
354 between cell types, and thus analysis in this space yields more patterns with signal across cell

355 types. If this hypothesis is correct, it seems possible that an enhancer-based space could  
356 provide another higher order feature, that could identify more patterns of regulatory biology that  
357 act across multiple cell types.

358

359 The projectR software package makes it possible to determine whether the patterns learned in  
360 one data set are present in others, and can do so in a way that is fast and easy to implement.  
361 This a major strength of the approach we present, as it helps to simultaneously extend and  
362 validate learned regulatory patterns, while also allowing for the comparison of regulatory biology  
363 in multiple scATAC-seq data sets. Most current scATAC-seq analysis methods are limited in  
364 application to a single data set and any results cannot be directly related to other data sets or  
365 analyses. This fact severely limits the efficiency of broad analyses, and the information that can  
366 be learned from distinct but complementary data sets. ProjectR thus synergizes with CoGAPS  
367 and has tremendous potential for use in analyzing disease-specific data sets. For example, if we  
368 can establish robust signatures of disease or treatment associated biology, such as genomic  
369 dysregulation and markers of drug efficacy, respectively, we can use CoGAPS and projectR to  
370 leverage clinical data for an improved understanding of disease mechanisms [\(32\)](#), [\(33\)](#) and to  
371 guide treatment decisions.

372

373 Matrix factorization is well suited to the problem of understanding scATAC-seq data, as the  
374 technique learns patterns that distinguish both features and cells within the two factorized output  
375 matrices. This output is conducive to a more thorough analysis of the regulatory differences  
376 between the cell populations in the data than most available methods can provide. Thus, it is  
377 unsurprising that matrix factorization has been previously applied to scATAC-seq analysis [\(34\)](#),  
378 [\(35\)](#), [\(36\)](#). We use CoGAPS because the Bayesian optimization of the factorization has been  
379 previously shown to be more robust to initialization than gradient-based NMF, resulting in more

380 biologically relevant patterns [\(11\)](#), [\(12\)](#), [\(37\)](#). Duren et al. and Zeng et al. each apply a coupled  
381 factorization for integrative analysis of multiple sequencing modalities, allowing for simultaneous  
382 clustering and investigation of regulatory biology [\(34\)](#), [\(35\)](#), [\(36\)](#). ProjectR can potentially be  
383 applied to the output of these coupled factorizations, allowing for transfer of these integrated  
384 patterns of regulatory biology across data sets. Coupled factorization may be a promising  
385 avenue for future development of integrative analysis with CoGAPS, and projectR will be able to  
386 serve in this context to determine whether different coupled factorization methods identify  
387 similar patterns of regulatory biology.

388  
389 We note that multi-platform data integration is a broad area of research, extending well beyond  
390 matrix factorization based approaches. Coupled correlation analysis has recently been applied  
391 to scATAC-seq and scRNA-seq, both allowing for integrative analysis and imputation of spatial  
392 transcriptomics information [\(38\)](#). Linked Self-Organizing Maps have also been used in this  
393 context, providing the capacity to find differences between relatively similar cell types [\(39\)](#). In  
394 the area of experimental methods development, recent research has provided techniques for  
395 parallel sequencing of RNA, accessibility, and methylation from single cells, vastly lowering both  
396 the time and monetary cost of joint profiling of single cells [\(40\)](#), [\(41\)](#). Further, multiple efforts are  
397 underway to sequence transcriptomics and chromatin accessibility from the same single cell,  
398 which promises to improve the fidelity of multimodal analysis and the ability of multi-omics  
399 computational methods to learn the regulatory biology of constituent cell populations.

400

## 401 **Conclusions**

402 The ATAC-CoGAPS analysis framework provides robust tools for identifying regulatory biology  
403 from scATAC-seq data. Further, it provides the capacity for integrative multi-omics analysis, as  
404 well as Transfer Learning of accessibility signatures across data sets. These characteristics



405 allow the ATAC-CoGAPS framework to produce consensus signatures of cell populations that  
406 apply across sequencing modalities and across variations in cellular conditions, which is  
407 infeasible with other currently available methods.

408

## 409 **Methods**

### 410 ATAC-CoGAPS Pipeline

411 The ATAC-CoGAPS software is freely available as an R package from  
412 <https://github.com/FertigLab/ATACCoGAPS>. Briefly, this software package includes functions  
413 for preprocessing of scATAC-seq data to run the CoGAPS algorithm (version  $\geq 3.5.13$ ), as well  
414 as functions for subsequent analysis of the results. Each of the steps taken to perform the  
415 standard ATAC-CoGAPS workflow are demonstrated at <https://rossinerbe.github.io/>. All  
416 analyses performed to produce the results described in this work are available from  
417 <https://github.com/rossinerbe/ATACCoGAPS-Analysis-Code>.

418

419 Input reads from a scATAC-seq experiment are summarized into some feature space (peaks,  
420 DNA motifs, etc.) and into an input count matrix, features by cells. Specific preprocessing steps  
421 are outlined in the analysis code linked above. Next, the count matrix is input to the  
422 R/Bioconductor package CoGAPS. CoGAPS employs a sparse, Bayesian non-negative matrix  
423 factorization algorithm to decompose the scATAC-seq count matrix  $\mathbf{C}$ , features by cells, into an  
424 Amplitude matrix  $\mathbf{A}$ , features by learned patterns, and a Pattern matrix  $\mathbf{P}$ , learned patterns by  
425 cells as described in (11) and (12). The primary parameter for the application of CoGAPS is  
426 then the feature level summarization and number of learned patterns, described in further detail  
427 below. To account for sparsity, we filter this input count matrix  $\mathbf{C}$  is filtered to remove any  
428 feature or cell that is more than 99% zero.

429

430 The next steps of the ATAC-CoGAPS analysis framework then focuses on the output **A** and **P**  
431 matrices. Unless otherwise noted, all steps are functionalized within the ATACCoGAPS  
432 package and all outside packages used are wrapped within ATACCoGAPS functions (see the  
433 workflow at <https://rossinerbe.github.io/> for detailed implementation with code). We first evaluate  
434 the results object from CoGAPS by plotting the Pattern matrix **P** (learned patterns by cells) to  
435 determine which patterns differentiate which cell populations. Annotations of patterns to cell  
436 populations are made using the PatternMarker statistic to determine the pattern each cell is  
437 most defined by, thereby clustering cells to each pattern. Alternatively, if *a priori* determined cell  
438 populations are known (e.g. by fluorescence activated cell sorting) we can determine which of  
439 these populations have significant signal in a pattern by calling the pairwise.wilcox.test R  
440 function for each pattern (not functionalized in ATAC-CoGAPS). The Adjusted Rand Index is  
441 used to quantify the overall clustering of CoGAPS on the Schep et al. data set (6) using the  
442 pattern to cell line annotations listed in Supplemental Table 2. Once these correspondences of  
443 pattern to cell type are annotated, we can then turn to the Amplitude matrix **A** (features by  
444 learned patterns). We apply the PatternMarker statistic to find the accessible features that most  
445 strongly contribute to each pattern, and thus most define the cell population they distinguish.  
446 The number of features used in these analyses is determined by thresholding of the  
447 PatternMarker statistic such that the feature is assigned to the pattern for which its association  
448 is scored most highly (12).

449

450 Analysis of the amplitude matrix **A** also depends critically on functional annotation. If peaks are  
451 used as summarization, we first match peaks to genes within or near those regions using the  
452 GenomicRanges R package version 1.36.1 (42). We then find enrichment of those genes within  
453 known pathways from MSigDB (in this work we demonstrate this capability using Hallmark  
454 Pathways v7.0) (27), (43) using the GeneOverlap R package version 1.20.0 (16).

455

456 Additionally, peaks are matched to DNA motifs with potential TF binding sites using the  
457 motifmatchR Package version 1.6.0 (6). TFs with common possible binding sites in multiple  
458 PatternMarker accessible regions are returned, along with functional annotations, so the  
459 biological plausibility of a TF's activity in a particular cell population based on known function  
460 can be considered alongside the enrichment results. Next, the accessibility of the peaks  
461 overlapping with the TF gene itself is evaluated relative to the general accessibility of peaks for  
462 that cell population to provide evidence as to whether the TF itself is expressed. For each peak  
463 that overlaps with the TF gene, the number of cells with accessible reads are counted within the  
464 cell population of interest. This number is averaged for all peaks overlapping the TF gene and  
465 then this average is divided by the average quantity of accessible cells for all peaks in the cell  
466 population. The resultant fold accessibility value is not intended as a precise quantification, but  
467 rather an approximate guide to assess whether a gene is generally accessible in a particular cell  
468 population.

469

470 If the data is summarized to motifs before running CoGAPS using ATACCoGAPS preprocessing  
471 functions (which employ motifmatchR for motif matching), the downstream analysis is performed  
472 similar to the above. Common TF bindings are returned and assessed for relative accessibility  
473 to determine whether the TFs are likely to be themselves expressed in the cell population.  
474 Relative accessibility of the TF genes is calculated as described previously.

475

476 Learned patterns can be projected into other data sets to determine if the signatures identifying  
477 cell populations within one data set apply more generally. We use the projectR package version  
478 1.0.0 (13), (14) to perform this analysis. If we use a peak feature space for transfer learning,  
479 peaks in the target data set must be matched to peaks in the source data set to project the

480 patterns learned in the source data set. We use the set of all peaks that have any overlap  
481 between the two sets as the features we project from and into. If we instead apply DNA motifs  
482 as the feature space, all motifs that occur in both data sets are used for projection.

483

484 We apply CoGAPS to scRNA-seq data in order to validate candidate TFs identified by scATAC-  
485 seq analysis. First, patterns that distinguish the same cell populations are identified. Then, the  
486 PatternMarker statistic is used to rank the scRNA-seq genes most associated to each pattern.  
487 The TFs identified as described above in scATAC-seq are matched to annotations from the  
488 TRRUST database version 2 [\(44\)](#) which list the genes the TFs are known to regulate. These  
489 gene sets are compared to the scRNA-seq CoGAPS based gene rankings by gene set  
490 enrichment analysis implemented with the fgsea R package version 1.10.1 [\(45\)](#). TFs with  
491 significant enrichment of the genes they are known to regulate are considered to be supported  
492 by multimodal analysis.

493

#### 494 CoGAPS Hyperparameters

495 All CoGAPS analyses presented in this manuscript are performed with CoGAPS version 3.70.0.  
496 Factorizations are performed in parallel across random subsets of features using the genome-  
497 wide option [\(12\)](#) (which should be used unless there are more cells than the features, in which case  
498 the single-cell option should be used instead) and 10,000 iterations. The only remaining free  
499 input parameter for CoGAPS is then the number of patterns,  $n$ , to learn from the data. The input  
500 matrix is features by cells, the Amplitude matrix is features by  $n$ , and the Pattern matrix is  $n$  by  
501 cells. We note that selecting the number of patterns for unsupervised learning methods is an  
502 open question in machine learning. Previously, we and others have found that pattern  
503 robustness and chi-squared statistics for goodness of fit across a range of values of  $n$  provide  
504 performance metrics for selection of  $n$  [\(46\)](#), [\(47\)](#). *A priori* knowledge of the set of conditions or

505 populations each cell derives from can provide an initial heuristic for the selection of  $n$ . Several  
506 CoGAPS runs can be performed in parallel to test different numbers of patterns. After these  
507 CoGAPS runs, a Chi-squared test can be performed on the output to determine the goodness of  
508 fit of the results and provide numerical guidance on the question of how well different numbers  
509 of patterns fit the data.

510

### 511 **Public Data**

512 This study presents analyses on publicly available scATAC-seq data from [\(6\)](#) (GSE99172), [\(26\)](#)  
513 (GSE96769), and [\(28\)](#) (<https://github.com/loosolab/cardiac-progenitors> on 8/7/2019). In all  
514 cases, data were obtained at peak summary (see papers for alignment and peak calling details).  
515 Both the Schep et al. 2017 and the Buenrostro et al. 2018 scATAC-seq datasets were  
516 downloaded with peaks of equal width. The peaks called for the Jia et al. 2018 data set were not  
517 of equal width, so counts were normalized by dividing the values of each peak by its nucleotide  
518 width. Motif counts were obtained using ATACCoGAPS software to convert peak counts to motif  
519 counts. The scRNA-seq data set from Jia et al. 2018 contains matched single cells to the  
520 scATAC-seq dataset. These data were also obtained from [https://github.com/loosolab/cardiac-](https://github.com/loosolab/cardiac-progenitors)  
521 [progenitors](https://github.com/loosolab/cardiac-progenitors) on 8/7/2019 as normalized counts. Prior to running CoGAPS, all peaks and cells  
522 that were more than 99% sparse were filtered out of the data (32,789 peaks and 528 cells for  
523 the Schep et al. data set and none for the Jia et al. data set (as it was pre-filtered by Jia et al.)).  
524 CoGAPS was run for 7, 13, and 18 patterns in this work on the Schep et al. 2017 data set.  
525 CoGAPS was run for 7 patterns on the scATAC-seq data set and 6 patterns on the scRNA-seq  
526 data from Jia et al. 2018.

## References

1. Buenrostro JD, Giresi PG, Zaba LC, Chang HY, Greenleaf WJ. Transposition of native chromatin for fast and sensitive epigenomic profiling of open chromatin, DNA-binding proteins and nucleosome position. *Nat Methods*. 2013 Dec;10(12):1213–8.
2. Buenrostro JD, Wu B, Chang HY, Greenleaf WJ. ATAC-seq: A Method for Assaying Chromatin Accessibility Genome-Wide. *Curr Protoc Mol Biol*. 2015 Jan 5;109:21.29.1-21.29.9.
3. Klemm SL, Shipony Z, Greenleaf WJ. Chromatin accessibility and the regulatory epigenome. *Nat Rev Genet*. 2019;20(4):207–20.
4. Sun Y, Miao N, Sun T. Detect accessible chromatin using ATAC-sequencing, from principle to applications. *Hereditas*. 2019 Aug 15;156:29.
5. Bravo González-Blas C, Minnoye L, Papasokrati D, Aibar S, Hulselmans G, Christiaens V, et al. cisTopic: cis-regulatory topic modeling on single-cell ATAC-seq data. *Nat Methods*. 2019 Apr 8;16(5):397–400.
6. Schep AN, Wu B, Buenrostro JD, Greenleaf WJ. chromVAR: inferring transcription-factor-associated accessibility from single-cell epigenomic data. *Nat Methods*. 2017 Oct;14(10):975
7. de Boer CG, Regev A. BROCKMAN: deciphering variance in epigenomic regulators by k-mer factorization. *BMC Bioinformatics*. 2018 Jul 3;19(1):253.
8. Zamanighomi M, Lin Z, Daley T, Chen X, Duren Z, Schep A, et al. Unsupervised clustering and epigenetic classification of single cells. *Nat Commun*. 2018 Jun 20;9(1):2410.
9. Cusanovich DA, Hill AJ, Aghamirzaie D, Daza RM, Pliner HA, Berletch JB, et al. A Single-Cell Atlas of In Vivo Mammalian Chromatin Accessibility. *Cell*. 2018 Aug 23;174(5):1309-1324.e18.

10. Fang R, Preissl S, Hou X, Lucero J, Wang X, Motamedi A, et al. Fast and Accurate Clustering of Single Cell Epigenomes Reveals Cis -Regulatory Elements in Rare Cell Types. *BioRxiv*. 2019 Apr 22;
11. Fertig EJ, Ding J, Favorov AV, Parmigiani G, Ochs MF. CoGAPS: an R/C++ package to identify patterns and biological process activity in transcriptomic data. *Bioinformatics*. 2010 Nov 1;26(21):2792–3.
12. Stein-O'Brien GL, Carey JL, Lee WS, Considine M, Favorov AV, Flam E, et al. PatternMarkers & GWCoGAPS for novel data-driven biomarkers via whole transcriptome NMF. *Bioinformatics*. 2017 Jun 15;33(12):1892–4.
13. Stein-O'Brien GL, Clark BS, Sherman T, Zibetti C, Hu Q, Sealfon R, et al. Decomposing Cell Identity for Transfer Learning across Cellular Measurements, Platforms, Tissues, and Species. *Cell Syst*. 2019 May 22;8(5):395-411.e8.
14. Sharma G, Colantuoni C, Goff LA, Stein-O'Brien GL, Fertig E. projectR: An R/Bioconductor package for transfer learning via PCA, NMF, correlation, and clustering. *BioRxiv*. 2019 Aug 6;
15. Stein-O'Brien GL, Arora R, Culhane AC, Favorov AV, Garmire LX, Greene CS, et al. Enter the Matrix: Factorization Uncovers Knowledge from Omics. *Trends Genet*. 2018 Aug 22;34(10):790–805.
16. Li S. GeneOverlap: An R package to test and visualize gene overlaps.
17. Way GP, Zietz M, Himmelstein DS, Greene CS. Sequential compression across latent space dimensions enhances gene expression signatures. *BioRxiv*. 2019 Mar 11;
18. Hu X, Li X, Valverde K, Fu X, Noguchi C, Qiu Y, et al. LSD1-mediated epigenetic modification is required for TAL1 function and hematopoiesis. *Proc Natl Acad Sci USA*. 2009 Jun 23;106(25):10141–6.

19. Tian J, Li Z, Han Y, Jiang T, Song X, Jiang G. The progress of early growth response factor 1 and leukemia. *Intractable Rare Dis Res*. 2016 May;5(2):76–82.
20. Yao J, Zhong L, Zhong P, Liu D, Yuan Z, Liu J, et al. RAS-Responsive Element-Binding Protein 1 Blocks the Granulocytic Differentiation of Myeloid Leukemia Cells. *Oncol Res*. 2019 Jul 12;27(7):809–18.
21. Manzella L, Conte E, Cocchiario G, Guarniera E, Sciacca B, Bonaiuto C, et al. Role of interferon regulatory factor 1 in monocyte/macrophage differentiation. *Eur J Immunol*. 1999 Sep;29(9):3009–16.
22. Coccia EM, Del Russo N, Stellacci E, Testa U, Marziali G, Battistini A. STAT1 activation during monocyte to macrophage maturation: role of adhesion molecules. *Int Immunol*. 1999 Jul;11(7):1075–83.
23. Friedman AD. Transcriptional regulation of myelopoiesis. *Int J Hematol*. 2002 Jun;75(5):466–72.
24. Chen HM, Zhang P, Voso MT, Hohaus S, Gonzalez DA, Glass CK, et al. Neutrophils and monocytes express high levels of PU.1 (Spi-1) but not Spi-B. *Blood*. 1995 May 15;85(10):2918–
25. Ohneda K, Yamamoto M. Roles of hematopoietic transcription factors GATA-1 and GATA-2 in the development of red blood cell lineage. *Acta Haematol*. 2002;108(4):237–45.
26. Buenrostro JD, Corces MR, Lareau CA, Wu B, Schep AN, Aryee MJ, et al. Integrated Single-Cell Analysis Maps the Continuous Regulatory Landscape of Human Hematopoietic Differentiation. *Cell*. 2018 May 31;173(6):1535-1548.e16.
27. Subramanian A, Tamayo P, Mootha VK, Mukherjee S, Ebert BL, Gillette MA, et al. Gene set enrichment analysis: a knowledge-based approach for interpreting genome-wide expression profiles. *Proc Natl Acad Sci USA*. 2005 Oct 25;102(43):15545–50.



28. Jia G, Preussner J, Chen X, Guenther S, Yuan X, Yekelchik M, et al. Single cell RNA-seq and ATAC-seq analysis of cardiac progenitor cell transition states and lineage settlement. *Nat Commun.* 2018 Nov 19;9(1):4877.
29. Meins M, Henderson DJ, Bhattacharya SS, Sowden JC. Characterization of the human TBX20 gene, a new member of the T-Box gene family closely related to the Drosophila H15 gene. *Genomics.* 2000 Aug 1;67(3):317–32.
30. Harris AP, Ismail KA, Nunez M, Martopullo I, Lencinas A, Selmin OI, et al. Trichloroethylene perturbs HNF4a expression and activity in the developing chick heart. *Toxicol Lett.* 2018 Mar 15;285:113–20.
31. Mohammadi S, Davila-Velderrain J, Kellis M. Multi-resolution single-cell state characterization via joint archetypal/network analysis. *BioRxiv.* 2019 Aug 24;
32. Fertig EJ, Ren Q, Cheng H, Hatakeyama H, Dicker AP, Rodeck U, et al. Gene expression signatures modulated by epidermal growth factor receptor activation and their relationship to cetuximab resistance in head and neck squamous cell carcinoma. *BMC Genomics.* 2012 May 1;13:160.
33. Stein-O'Brien G, Kagohara LT, Li S, Thakar M, Ranaweera R, Ozawa H, et al. Integrated time course omics analysis distinguishes immediate therapeutic response from acquired resistance. *Genome Med.* 2018 May 23;10(1):37.
34. Duren Z, Chen X, Zamanighomi M, Zeng W, Satpathy AT, Chang HY, et al. Integrative analysis of single-cell genomics data by coupled nonnegative matrix factorizations. *Proc Natl Acad Sci USA.* 2018 Jul 24;115(30):7723–8.
35. Zeng W, Chen X, Duren Z, Wang Y, Jiang R, Wong WH. DC3 is a method for deconvolution and coupled clustering from bulk and single-cell genomics data. *Nat Commun.* 2019 Oct 10;10(1):4613.

36. Welch JD, Kozareva V, Ferreira A, Vanderburg C, Martin C, Macosko EZ. Single-Cell Multi-omic Integration Compares and Contrasts Features of Brain Cell Identity. *Cell*. 2019 Jun 13;177(7):1873-1887.e17.
37. Ochs MF, Fertig EJ. Matrix factorization for transcriptional regulatory network inference. *IEEE Symp Comput Intell Bioinforma Comput Biol Proc*. 2012 May;2012:387–96.
38. Stuart T, Butler A, Hoffman P, Hafemeister C, Papalexi E, Mauck WM, et al. Comprehensive Integration of Single-Cell Data. *Cell*. 2019 Jun 13;177(7):1888-1902.e21.
39. Jansen C, Ramirez RN, El-Ali NC, Gomez-Cabrero D, Tegner J, Merckenschlager M, et al. Building gene regulatory networks from scATAC-seq and scRNA-seq using Linked Self Organizing Maps. *PLoS Comput Biol*. 2019 Nov 4;15(11):e1006555.
40. Clark SJ, Argelaguet R, Kapourani C-A, Stubbs TM, Lee HJ, Alda-Catalinas C, et al. scNMT-seq enables joint profiling of chromatin accessibility DNA methylation and transcription in single cells. *Nat Commun*. 2018 Feb 22;9(1):781.
41. Cao J, Cusanovich DA, Ramani V, Aghamirzaie D, Pliner HA, Hill AJ, et al. Joint profiling of chromatin accessibility and gene expression in thousands of single cells. *Science*. 2018 Sep 28;361(6409):1380–5.
42. Lawrence M, Huber W, Pagès H, Aboyoun P, Carlson M, Gentleman R, et al. Software for computing and annotating genomic ranges. *PLoS Comput Biol*. 2013 Aug 8;9(8):e1003118.
43. Liberzon A, Subramanian A, Pinchback R, Thorvaldsdóttir H, Tamayo P, Mesirov JP. Molecular signatures database (MSigDB) 3.0. *Bioinformatics*. 2011 Jun 15;27(12):1739–40.
44. Han H, Cho J-W, Lee S, Yun A, Kim H, Bae D, et al. TRRUST v2: an expanded reference database of human and mouse transcriptional regulatory interactions. *Nucleic Acids Res*. 2018 Jan 4;46(D1):D380–6.
45. Sergushichev A. An algorithm for fast preranked gene set enrichment analysis using cumulative statistic calculation. *BioRxiv*. 2016 Jun 20;

46. Bidaut G, Ochs MF. ClutrFree: cluster tree visualization and interpretation. *Bioinformatics*. 2004 Nov 1;20(16):2869–71.
47. Bidaut G, Suhre K, Claverie J-M, Ochs MF. Determination of strongly overlapping signaling activity from microarray data. *BMC Bioinformatics*. 2006 Feb 28;7:99.

## Figures

Figure 1

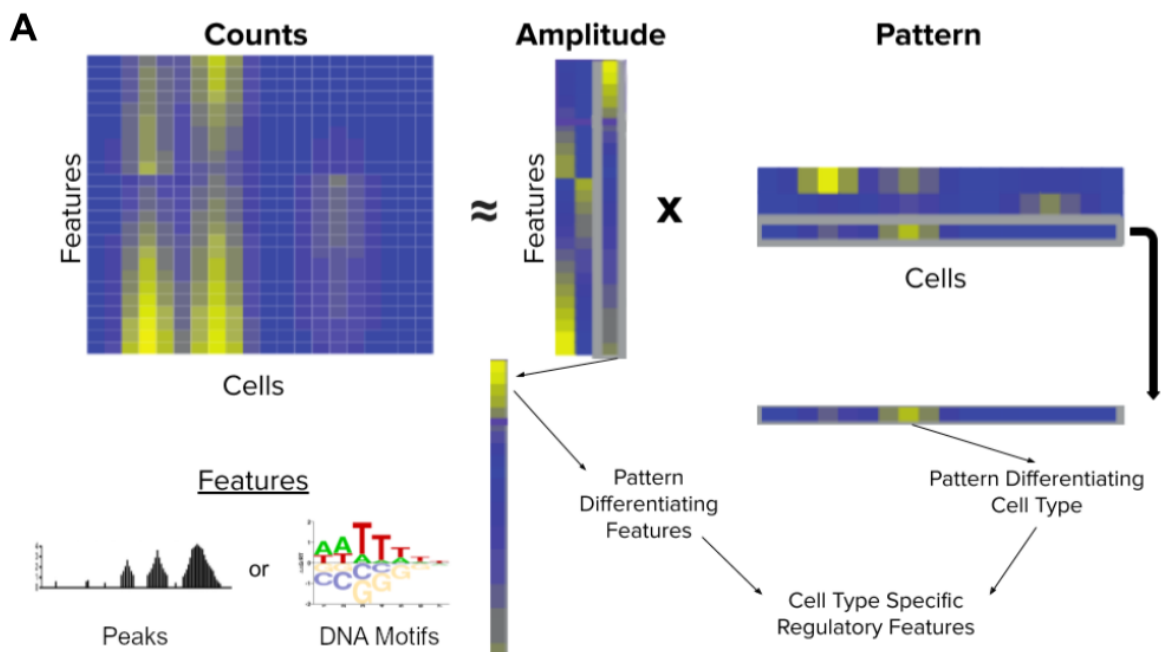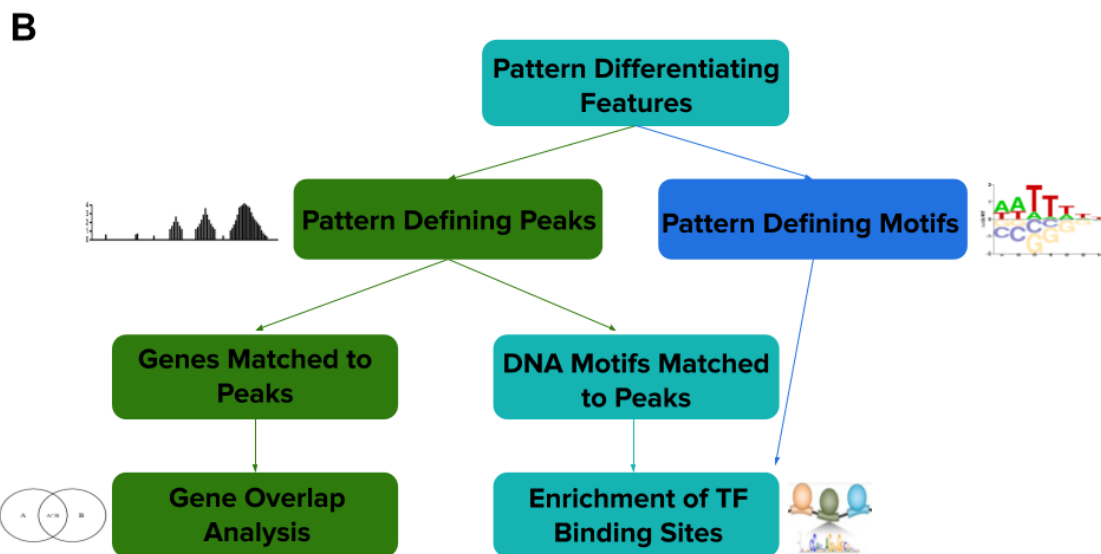

**A** Diagram of Non-negative Matrix Factorization as applied to scATAC-seq data by ATAC-CoGAPS. The Counts matrix (features by cells) is factorized into the Amplitude matrix (features

by learned patterns) and the Pattern matrix (learned patterns by cells). The patterns in the Pattern matrix differentiate cell populations, while the same patterns in the Amplitude matrix reveal the differentially accessible features of those cell types. These cell type specific patterns of accessibility can then be used to learn regulatory features that differ across cell populations.

**B** Diagram of the analysis approach applied for cell type associated features found by CoGAPS. Features used to produce the input count matrix can be either accessible peaks or DNA motifs. Pattern defining peaks identified by CoGAPS are either matched to genes for gene overlap analysis or matched to DNA motifs to infer TF binding potential. Pattern defining motifs are matched to enriched TFs, likewise to infer accessible binding sites and thus TF activity in identified cell populations.

Figure 2

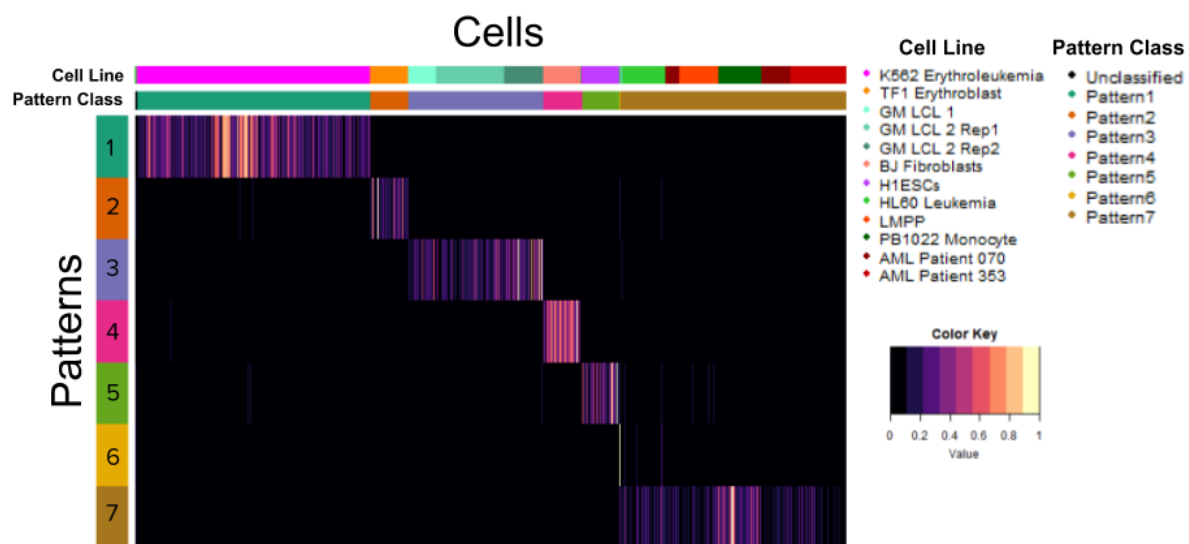

Heatmap of the Pattern matrix with cells matched to learned patterns. The color gradient of the heatmap reflects the Pattern Matrix weights for each cell for each pattern, which indicates the degree to which each pattern is found in each cell, as learned by CoGAPS. Cells are labelled by

both Pattern Marker pattern assignment as well as known cell line and culture of origin. Patterns 1-5 all very sharply distinguish a particular cell line. Pattern 6 only captures one cell. Most of the remaining cells are assigned to pattern 7, leaving only 5 cells unclassified.

Figure 3

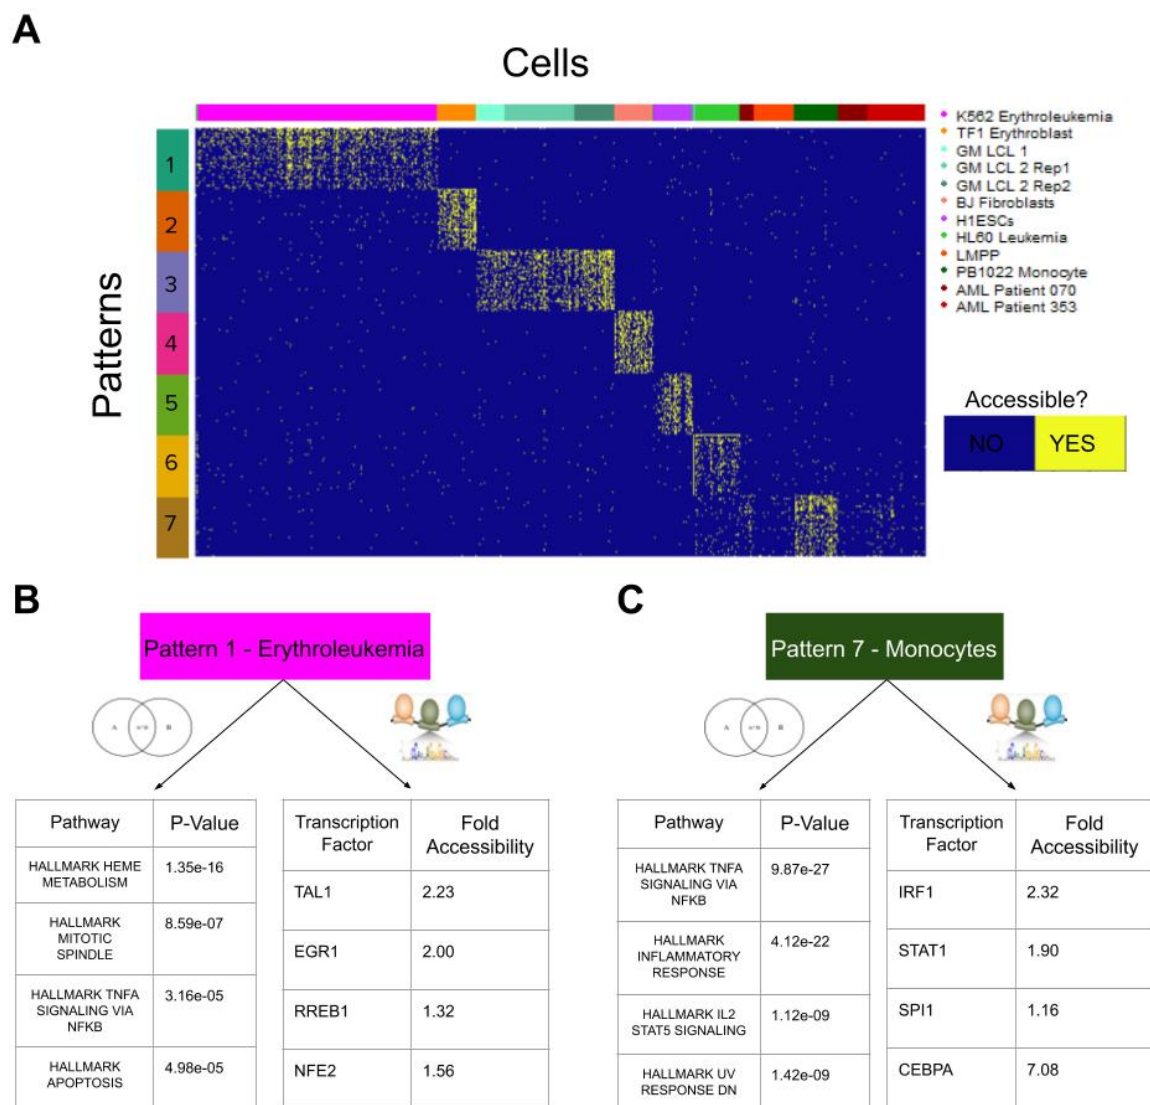

**A** The PatternMarker statistic is used to find the 50 most pattern-distinguishing peaks for each pattern. The counts recorded at these peaks from the scATAC-seq experiment are binarized for

accessibility and plotted across all cells in the data. **B,C** Examples of the MSigDB Hallmark Pathways with significant overlap to genes matched to PatternMarker peaks (the 4 most significant pathways for each pattern) and Transcription Factors with high numbers of possible binding sites in PatternMarker peaks. TFs listed are those that are both within the top 15 list of TFs with the most enriched binding sites and have highly plausible functional annotations for activity in these cell lines. Fold accessibility refers to the peaks overlapping with the region of the TF gene, relative to other peaks in the K562 Erythroleukemia cell line and PB1022 Monocyte cell line, respectively.

Figure 4

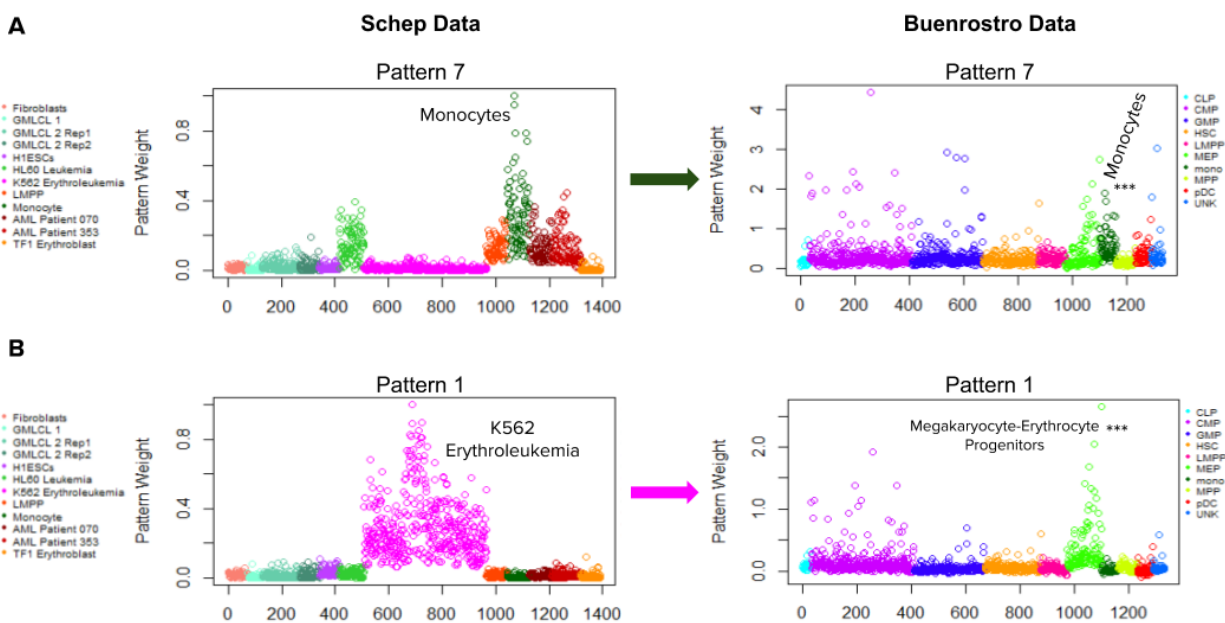

**A** Projection of peak accessibility associated primarily with monocytes in the Schep data set into the Hematopoietic lineage Buenrostro data set. The Monocytes in the Buenrostro set are the cell type most significantly associated with the pattern, as determined by a pairwise Wilcoxon Rank Sum Test. **B** Projection of the accessibility signature associated with the K562 Erythroleukemia cell line in the Schep data into the hematopoietic lineage data. This signature is

most significantly associated with Megakaryocyte-Erythrocyte Progenitor cells.

Figure 5

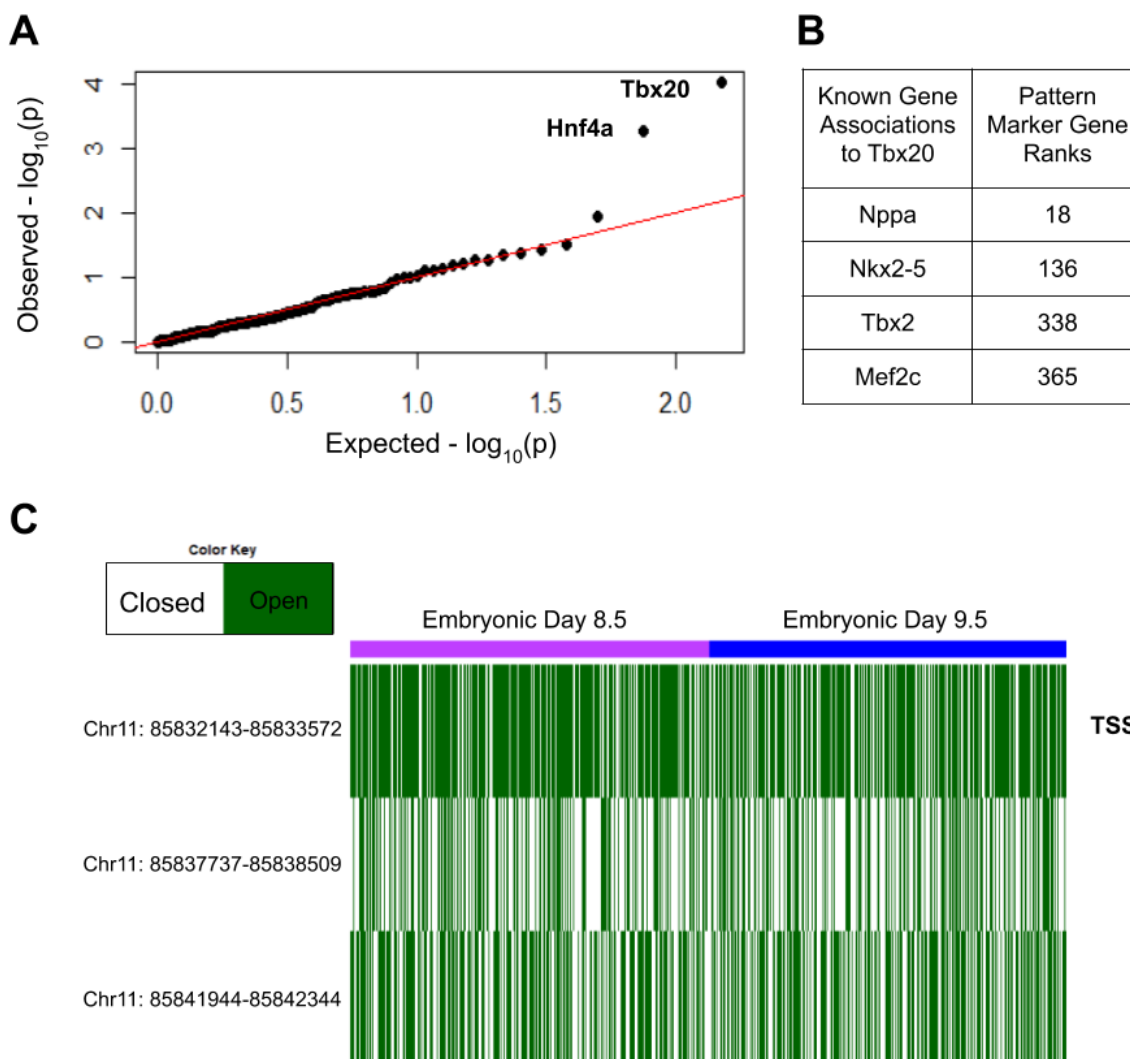

**A** qqPlot of p-values for gene set enrichment analysis of the Transcription Factors' gene networks predicted from scATAC-seq CoGAPS and the genes ranked by scRNA-seq CoGAPS.

**B** Known genes regulated by Tbx20 and their PatternMarker ranks from CoGAPS analysis in matched scRNA-seq. **C** Accessibility at the Tbx2 gene in the scATAC-seq data, showing the

correspondence of its accessibility and expression levels across mouse cardiac progenitor cells,



at embryonic days 8.5 and 9.5. The Transcriptional Start Site overlapping peak (marked with TSS) is the most consistently accessible.

### Supplemental Figures

#### Supplemental Figure 1

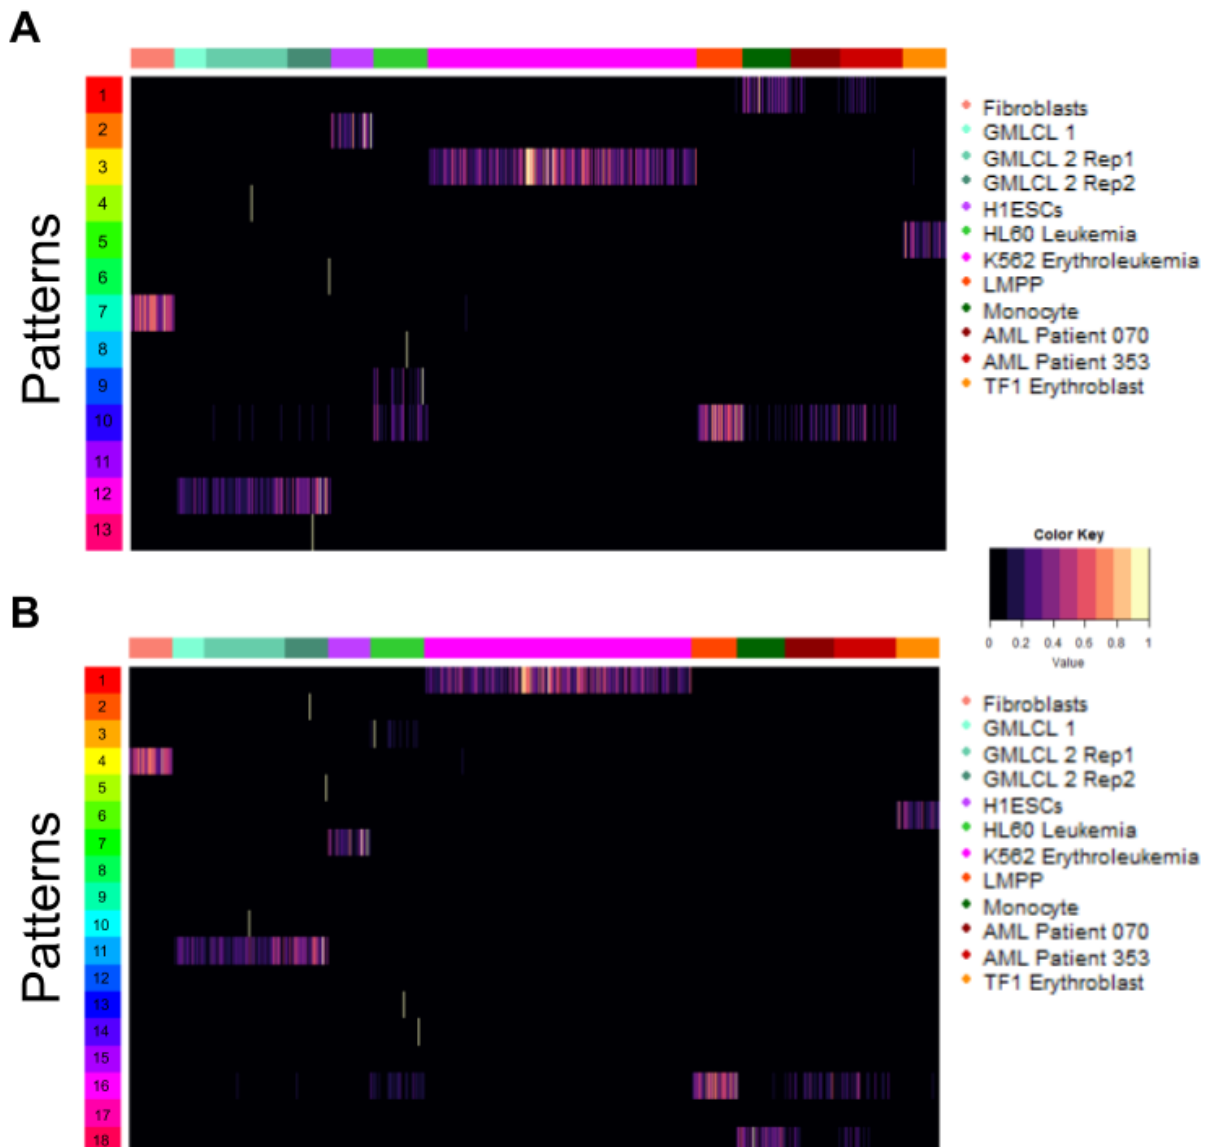

The Pattern matrix is plotted for CoGAPS runs using **A** 13 and **B** 18 patterns for the Schep et al

data. Several sparse signal patterns are observed. The monocyte pattern becomes more clear and a LMPP and patient leukemia pattern emerges, which are not seen when running the algorithm for 7 patterns. Pathway enrichment and TF prediction results are robust across different pattern numbers (ie. the patterns that distinguish the same cell types return the same most significant pathways and most enriched TFs for patterns defining the same cell lines) (see Analysis Code).

Supplemental Figure 2

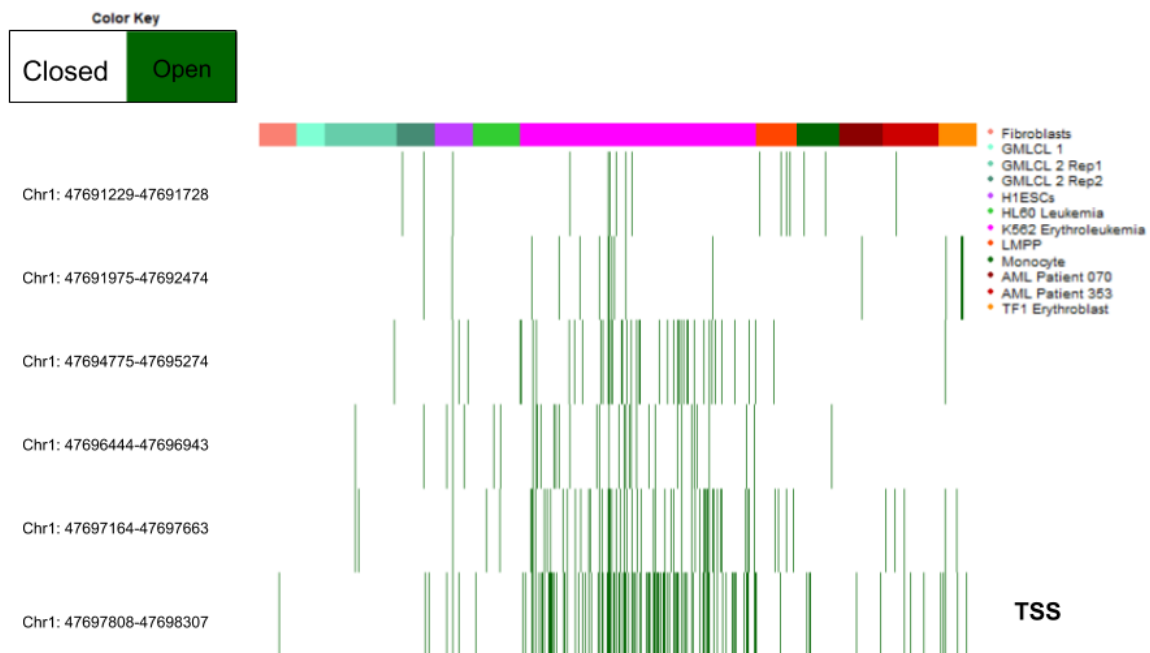

Plot of the binary accessibility of TAL1 overlapping peaks, revealing higher accessibility in K562 Erythroleukemia cells and providing evidence of its specific expression in that cell line. The peak overlapping with the Transcriptional Start Site is marked as TSS and is more consistently accessible among K562 cells than any other TAL1 overlapping peak.

Supplemental Figure 3

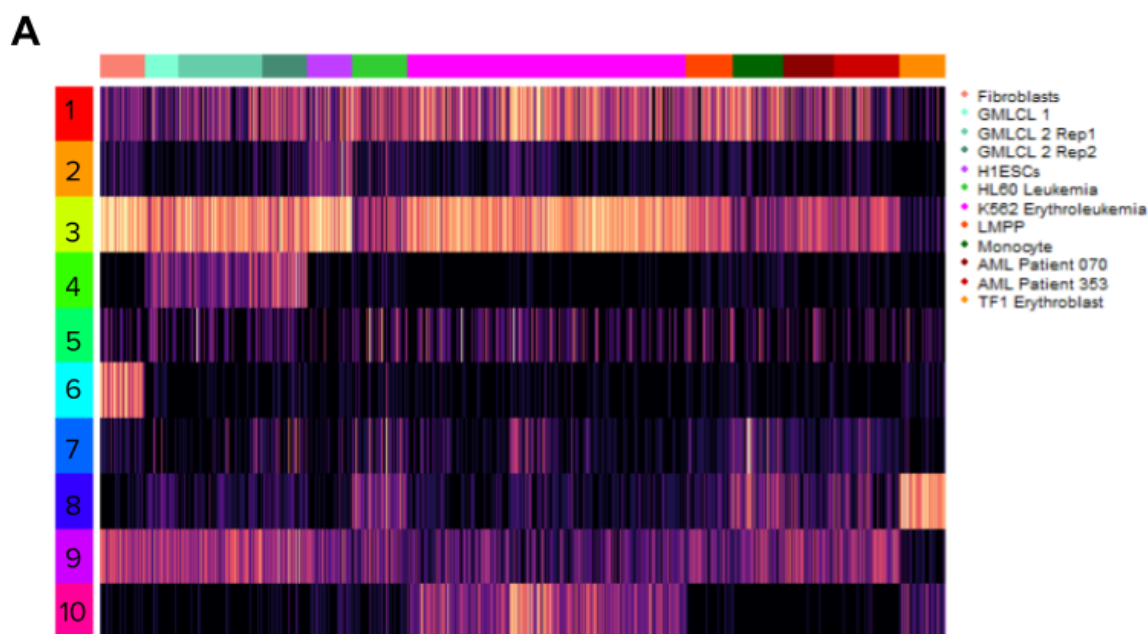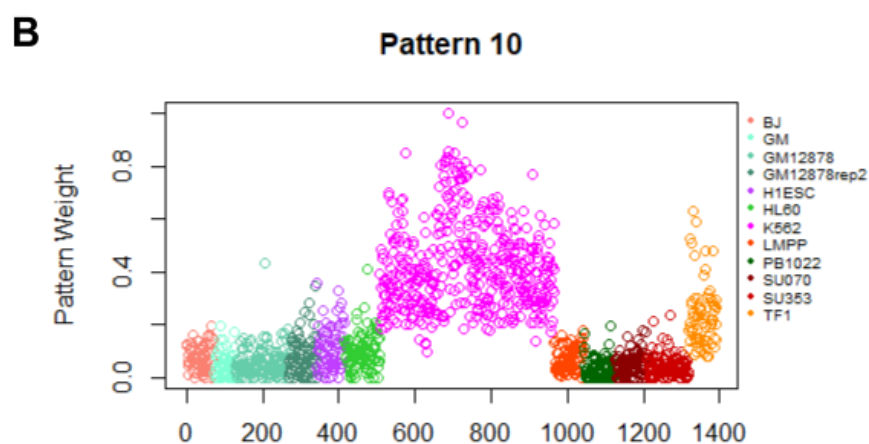

**A** Plot of the Pattern matrix after running CoGAPS with DNA motif summarization on the Schep et al data. The only parameter differences from the peak summarization are that this data is run for 10 patterns and it is run across fewer parallel cores due to there being fewer motifs than peaks. **B** Plot of a pattern found by CoGAPS in the Schep data set when it was run using motif summarization rather than peak summarization (the same as the 10th pattern plotted in **A**, plotted alone for increased visual clarity). Both TF1 erythroblasts and K562 Erythroleukemia cells are strongly associated with this pattern. We do not identify a similar pattern with summarization to peaks.

## Supplemental Figure 4

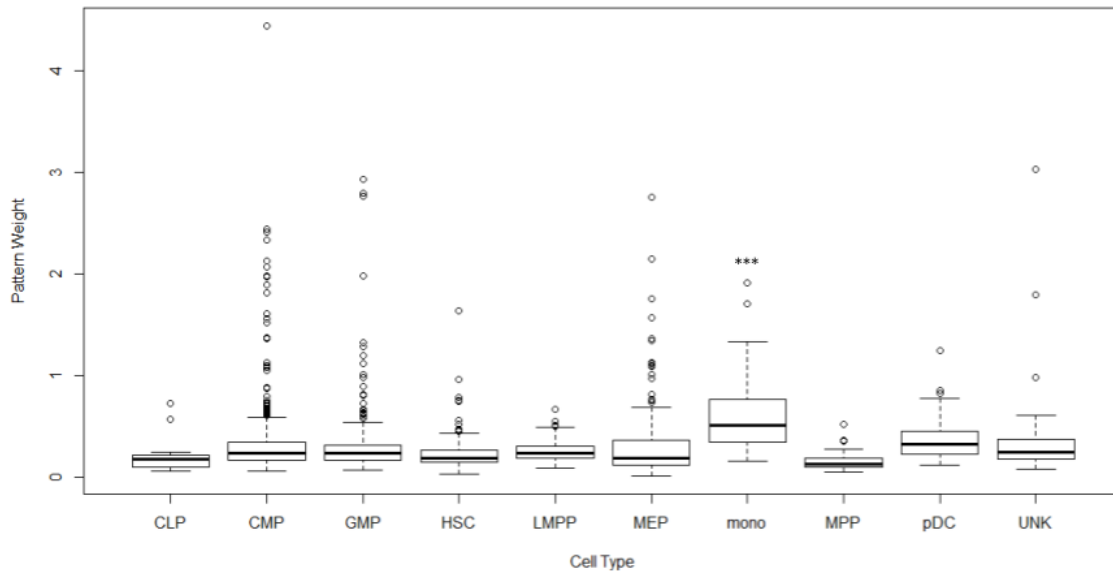

Boxplot of the pattern weight for the transfer of the monocyte associated pattern from the Schep data into the Buenrostro data. The monocytes in the Buenrostro data are most significantly associated with the pattern as evaluated by a Wilcoxon Rank Sum Test.

## Supplemental Figure 5

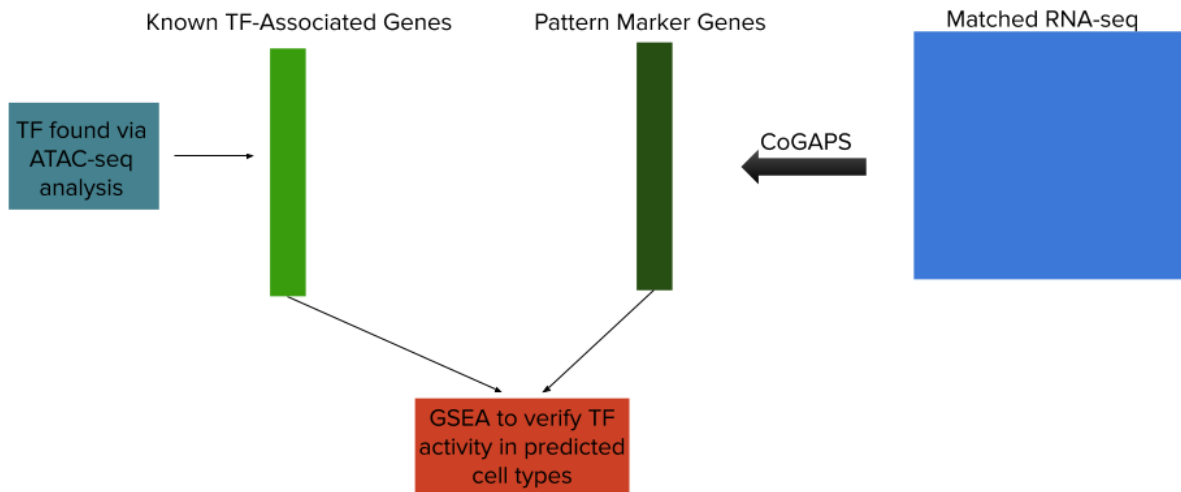

Diagram of the analysis method employed to validate ATAC-CoGAPS candidate using matched scRNA-seq data. The TFs identified by ATAC-CoGAPS are first matched to the sets of genes they regulate. Then, CoGAPS is run on the scRNA-seq data and PatternMarker genes are identified. GSEA is performed between the TF gene sets and the PatternMarker genes to provide transcription-based validation of TF activity.

## Supplemental Figure 6

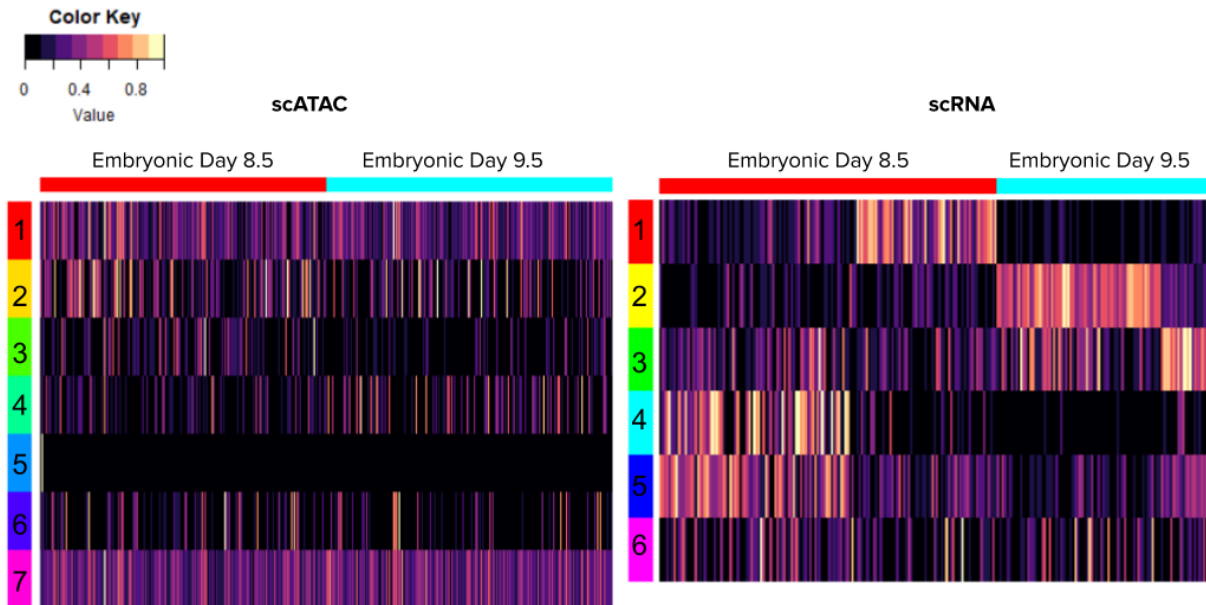

The Pattern matrices plotted for both scRNA-seq and scATAC-seq from matched cardiac development data derived from mouse embryos and published by Jia et al. scRNA CoGAPS finds more differentiating patterns, while most of the scATAC patterns are unifying across the similar cell types, suggesting scRNA-seq is either identifying populations subtypes that scATAC does not capture or is identifying batch effects in the RNA-seq data.

Supplemental Figure 7

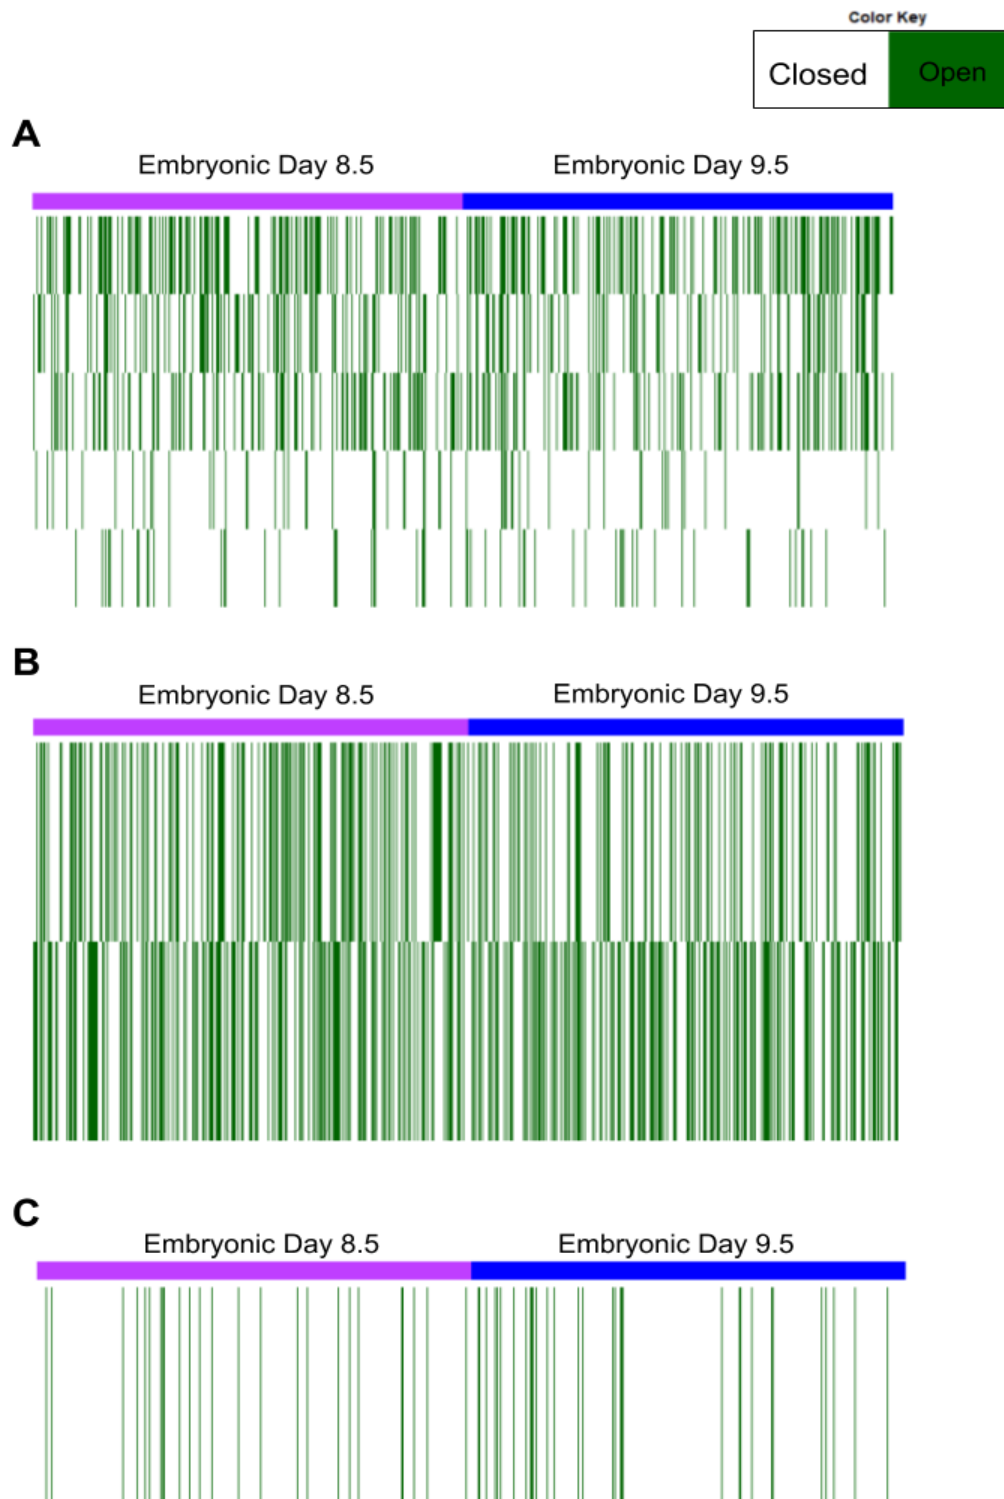

Plot of peaks with overlapping accessibility for the **A** Mef2c, **B** Nkx2-5, and **C** Nppa genes in the Jia et al. cardiac progenitor data.

### Supplemental Tables

#### Supplemental Table 1

| <b>Cell Line</b> | <b>Cell Type</b>                                           |
|------------------|------------------------------------------------------------|
| K562             | Erythroleukemia                                            |
| TF1              | Erythroblast                                               |
| GM-LCL           | B cell derived Lymphoblastoid cell line                    |
| BJ               | Foreskin Fibroblast                                        |
| H1ESC            | Embryonic stem cell                                        |
| HL60             | Leukemia (derived from human acute promyelocytic leukemia) |
| LMPP             | Lymphoid Primed Multipotent Progenitor                     |
| PB1022           | Monocyte                                                   |
| SU070            | Acute Myeloid Leukemia, Patient 070                        |
| SU353            | Acute Myeloid Leukemia, Patient 353                        |

List of the cell lines used in the Schep et al. data set, including the corresponding acronyms used to describe and label them.

#### Supplemental Table 2

| <b>Pattern</b> | <b>Corresponding Cell Line(s)</b> | <b>AUC</b> |
|----------------|-----------------------------------|------------|
| 1              | K562 Erythroleukemia              | 1.00       |
| 2              | TF1 Erythroblast                  | 1.00       |
| 3              | GM-LCL                            | 0.996      |
| 4              | BJ Fibroblast                     | 0.999      |
| 5              | H1ESC                             | 0.999      |
| 6              | HL60 Leukemia                     | 0.505      |
| 7              | PB1022, LMPP, SU070, SU353        | 0.86       |

Annotations of patterns to cell types and the area under the receiver operating curve for these correspondences based on PatternMarker pattern assignment of each cell.

#### Supplemental Table 3

| <b>Cell Type Abbreviation</b> | <b>Cell Type</b>                     |
|-------------------------------|--------------------------------------|
| CLP                           | Common Lymphoid Progenitor           |
| CMP                           | Common Myeloid Progenitor            |
| GMP                           | Granulocyte-Monocyte Progenitor      |
| HSC                           | Hematopoietic Stem Cell              |
| LMPP                          | Lymphoid Multipotent Progenitor      |
| MEP                           | Megakaryocyte-Erythrocyte Progenitor |



|      |                                    |
|------|------------------------------------|
| mono | Monocyte                           |
| MPP  | Multipotent Progenitor             |
| pDC  | Plasmacytoid Dendritic Cell        |
| UNK  | Unknown (derived from bone marrow) |

List of the cell lines used in the Buenrostro et al. data set, including the corresponding acronyms used to describe and label them.
